# Supplementary material
Source: PubMed Central journal article supplement (PMC1891213)

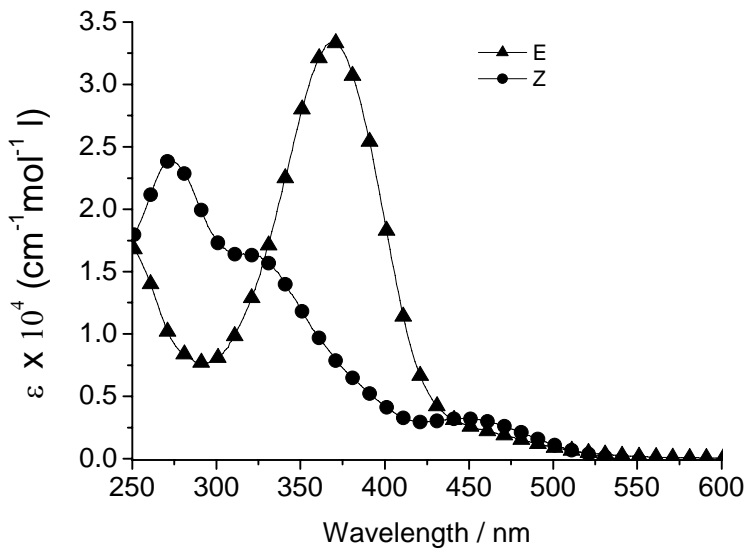

Supplement: pnas_0703748104_1.pdf [file pnas_0703748104_1.pdf]

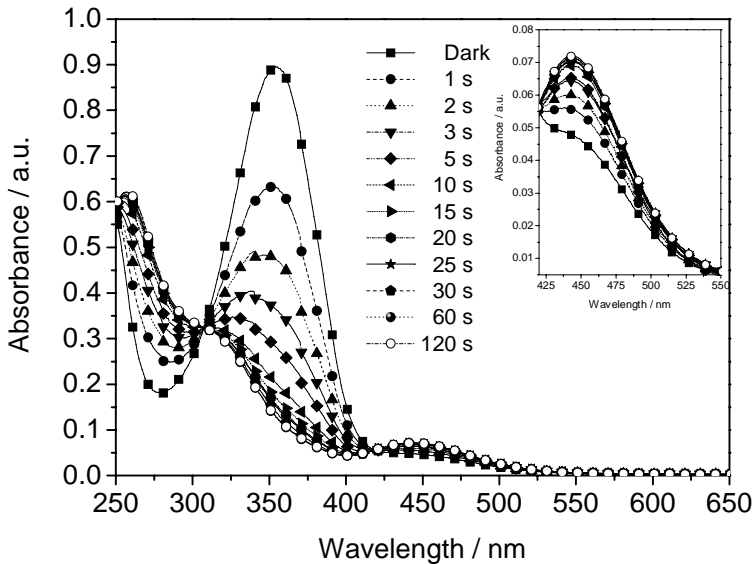

Supplement: pnas_0703748104_2.pdf [file pnas_0703748104_2.pdf]

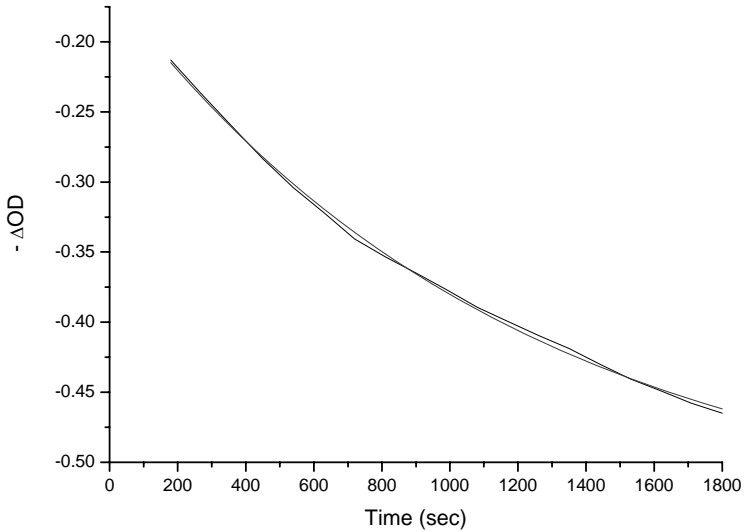

Supplement: pnas_0703748104_3.pdf [file pnas_0703748104_3.pdf]

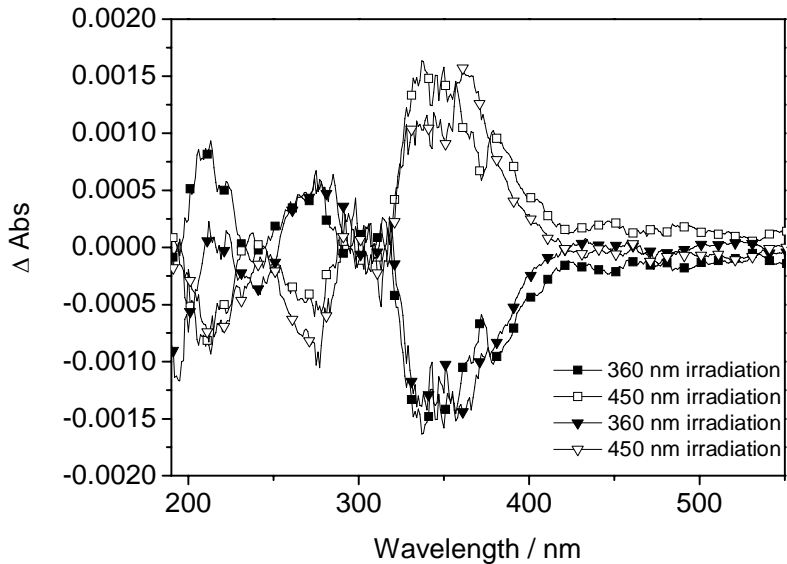

Supplement: pnas_0703748104_4.pdf [file pnas_0703748104_4.pdf]

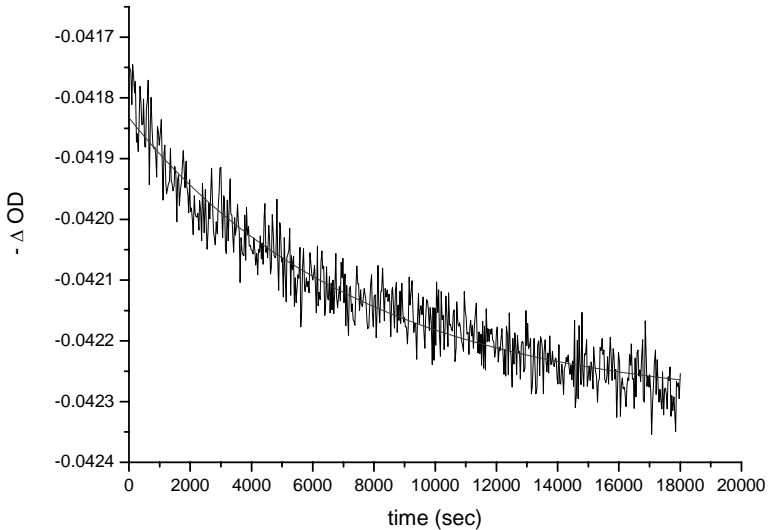

Supplement: pnas_0703748104_5.pdf [file pnas_0703748104_5.pdf]

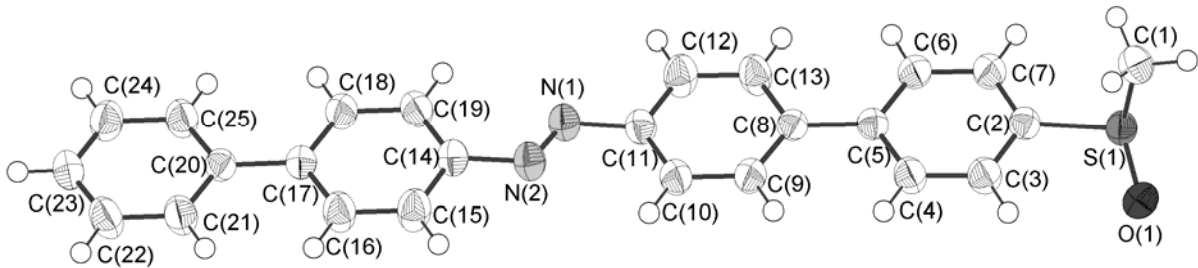

Supplement: pnas_0703748104_6.pdf [file pnas_0703748104_6.pdf]
